# Supplementary material for: The rapid counting method for 2-MIB-producing cyanobacteria (Pseudanabaena sp.) using fluorescence detection of phycocyanin pigments in algal cells
Source: Royal Society of Chemistry journal article supplement (doi:10.1039/d3ew00282a), 2023-01-01
Supplement: d3ew00282a1.pdf [file d3ew00282a1.pdf]

**Rapid counting method for 2-MIB-producing cyanobacteria  
(*Pseudanabaena* sp.) using fluorescence detection of phycocyanin  
pigments in algal cells**

*Supplementary Information*

Sandrine Boivin<sup>a</sup>, Eri Hasegawa<sup>b</sup>, Dabide Yamaguchi<sup>b</sup>, Takahiro Fujioka<sup>a,\*</sup>

<sup>a</sup>*Graduate School of Engineering, Nagasaki University, 1-14 Bunkyo-machi,  
Nagasaki 852-8521, Japan*

<sup>b</sup>*METAWATER Co. Ltd., 1-25 Kandasuda-cho, Chiyoda-ku, Tokyo 101-0041, Japan*

---

\* Corresponding author: Takahiro Fujioka, Email: tfujioka@nagasaki-u.ac.jp, Ph. +81 95 819 2695

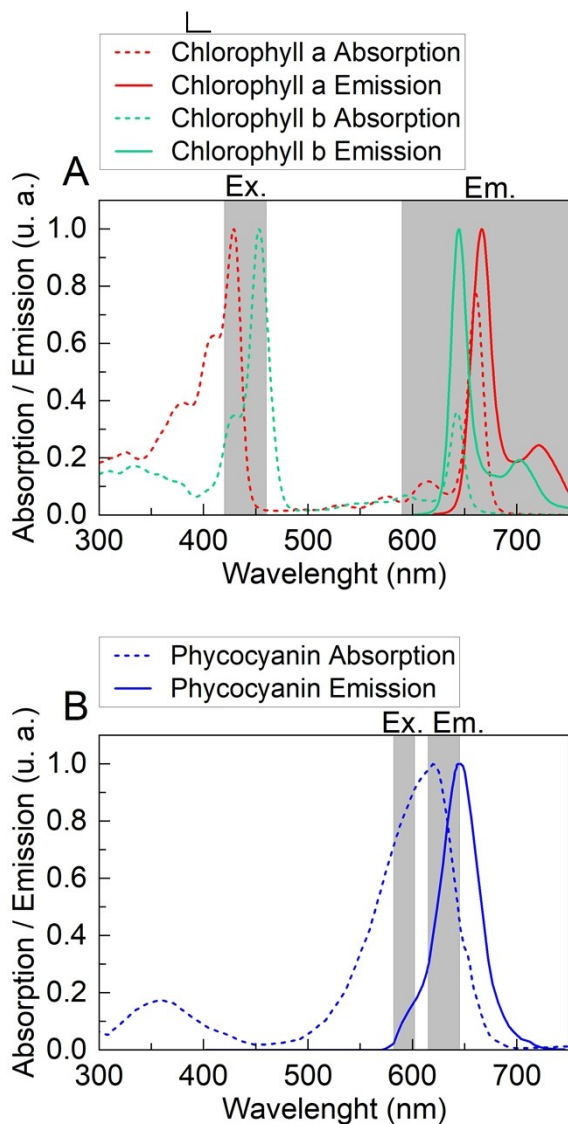

**Fig. S1** Absorbance (dot line) and fluorescence emission (solid line) spectra of chlorophyll a, chlorophyll b, and phycocyanin, as well as the excitation (Ex.) and emission (Em.) ranges of the filter selected for (A) chlorophyll and (B) phycocyanin fluorescence. All spectra were normalized. Chlorophyll a and b spectra were obtained from PhotochemCAD™ (<http://www.photochemcad.com>). Phycocyanin data were adapted from “The phycobilisomes: an early requisite for efficient photosynthesis in cyanobacteria.” By Singh NK, Sonani RR, Rastogi RP, Madamwar D., 2015 EXCLI Journal, 14:268-289. doi: [10.17179/excli2014-723](https://doi.org/10.17179/excli2014-723) Copyright © 2015 Singh et al.

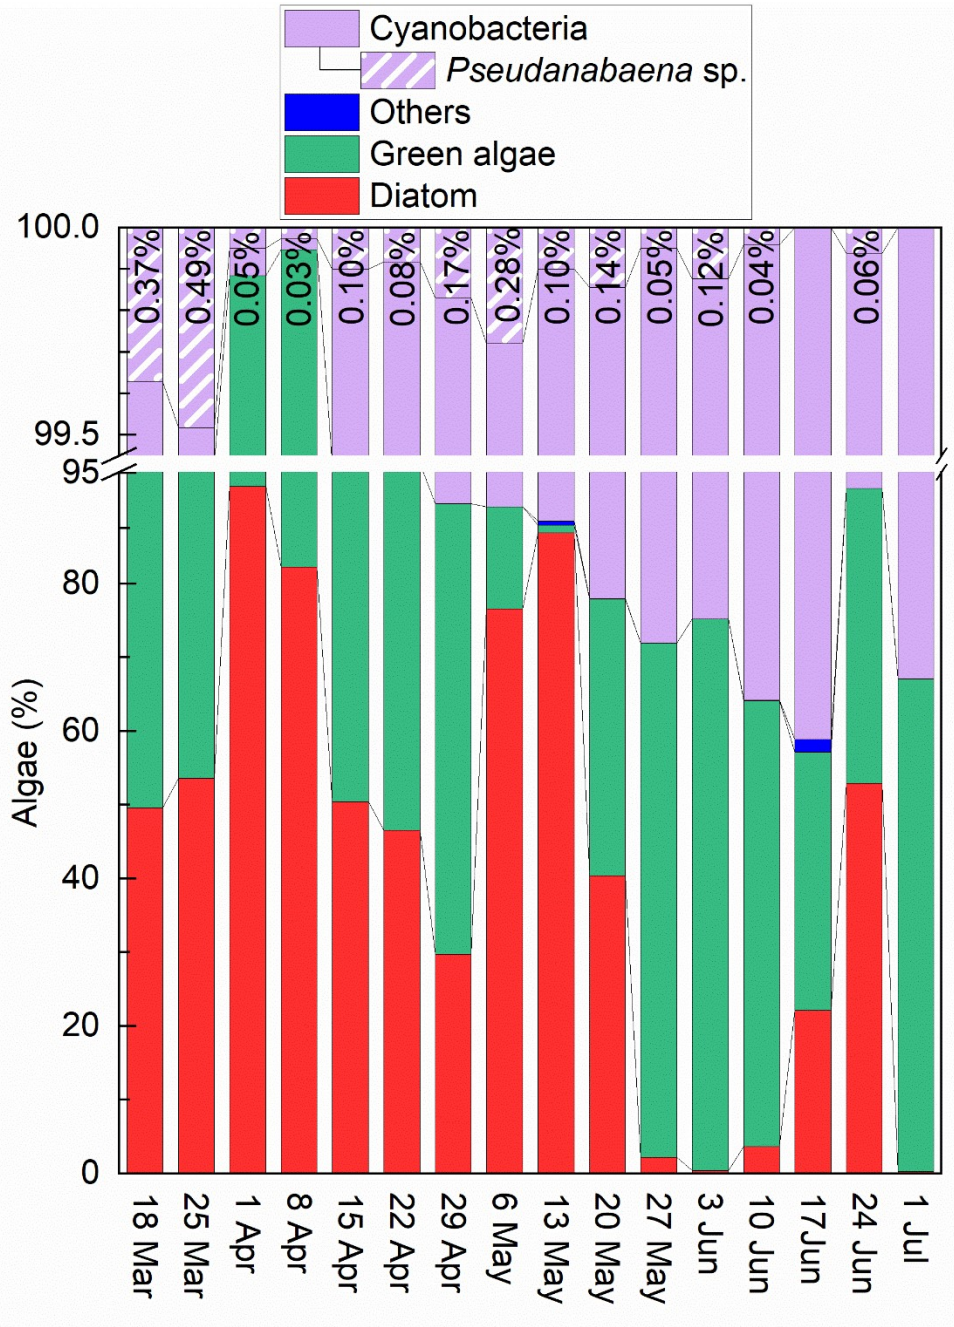

**Fig. S2** Percentage of each alga type in Lake Y from March 18 to July 1, 2022. Their concentrations were obtained from manual observations in the bright-field mode.

**Table S1** Water quality of samples collected from Lake Y from March to July 2022.

| Day      | Temperature | Chlorophyll<br>a | Geosmin | 2-MIB | pH  | Dissolved<br>oxygen |
|----------|-------------|------------------|---------|-------|-----|---------------------|
| Unit     | °C          | µg/L             | ng/L    | ng/L  | —   | mg/L                |
| 11 March | 11.0        | 30.3             | 0.8     | 3.6   | 9.0 | 13.3                |
| 18 March | 14.2        | 13.3             | 0.9     | 4.7   | 9.1 | 12.8                |
| 25 March | 12.0        | 51.5             | 0.9     | 7.4   | 8.8 | 12.3                |
| 01 April | 12.2        | 46.4             | 0.9     | 13.4  | 8.9 | 11.2                |
| 08 April | 13.0        | 34.6             | 0.9     | 8.9   | 8.2 | 12.6                |
| 15 April | 15.1        | 11.3             | 0.9     | 3.7   | 8.4 | 10.9                |
| 22 April | 14.0        | 20.2             | 0.9     | 3.0   | 7.8 | 10.7                |
| 28 April | 17.3        | 10.3             | 1.2     | 32    | 7.6 | 9.8                 |
| 06 May   | 16.5        | 26.7             | 1.0     | 2.9   | 7.5 | 10.5                |
| 13 May   | 16.0        | 36.3             | 0.9     | 4.1   | 9.2 | 11.1                |
| 20 May   | 19.3        | 8.7              | 1.2     | 2.9   | 9.1 | 11.2                |
| 27 May   | 19.7        | 4.8              | 1.1     | 0.7   | 8.0 | 9.5                 |
| 03 June  | 23.1        | 3.4              | 0.8     | 0.3   | 7.6 | 9.0                 |
| 10 June  | 22.0        | 5.5              | 0.8     | 0.5   | 7.9 | 9.5                 |
| 17 June  | 21.6        | 9.9              | 0.6     | 0.5   | 7.8 | 9.8                 |
| 24 June  | 22.0        | 15.6             | 0.4     | 0.0   | 7.4 | 8.7                 |
| 01 July  | 23.5        | 12.8             | 0.4     | 0.6   | 7.4 | 8.1                 |

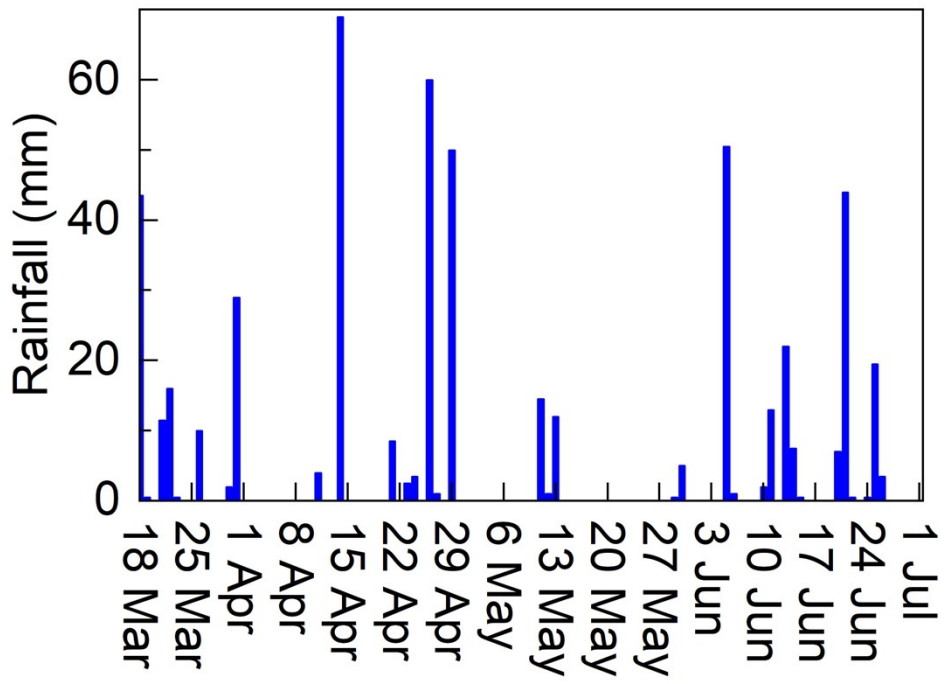

**Fig. S3** Rainfall during the assessment of Lake Y from March to July 2022.



**Table S2** Algae population (units/mL) in Lake Y from March to July 2022.

| Date                                       | 18<br>March  | 25<br>March  | 01<br>April   | 08<br>April  | 15<br>April  | 22<br>April  | 29<br>April  | 06<br>May    | 13<br>May    | 20<br>May    | 27<br>May    | 03<br>June   | 10<br>June   | 17<br>June   | 24<br>June   | 01<br>July   |
|--------------------------------------------|--------------|--------------|---------------|--------------|--------------|--------------|--------------|--------------|--------------|--------------|--------------|--------------|--------------|--------------|--------------|--------------|
| <b>Cyanobacteria</b>                       |              |              |               |              |              |              |              |              |              |              |              |              |              |              |              |              |
| <i>Anabaeana</i>                           | 0            | 0            | 0             | 0            | 0            | 0            | 0            | 0            | 0            | 0            | 0            | 0            | 0            | 0            | 0            | 0            |
| <i>Aphanocapsa</i>                         | 0            | 0            | 0             | 0            | 0            | 10           | 0            | 0            | 0            | 0            | 0            | 0            | 0            | 0            | 0            | 0            |
| <i>Microcystis</i>                         | 0            | 0            | 0             | 0            | 0            | 0            | 0            | 0            | 0            | 0            | 0            | 0            | 0            | 0            | 0            | 0            |
| <i>Pseudanabaena limnetica</i>             | 0            | 0            | 0             | 0            | 0            | 10           | 0            | 0            | 0            | 0            | 0            | 0            | 0            | 0            | 10           | 0            |
| <i>Pseudanabaena sp.</i>                   | 225          | 370          | 87            | 9            | 14           | 37           | 33           | 60           | 50           | 20           | 8            | 22           | 9            | 0            | 10           | 0            |
| Others (unicellular cyanobacteria)         | 660          | 660          | 30            | 0            | 300          | 600          | 1500         | 2180         | 5600         | 3000         | 2800         | 3960         | 8800         | 8000         | 1100         | 8650         |
| <b>Total</b>                               | <b>885</b>   | <b>1030</b>  | <b>117</b>    | <b>9</b>     | <b>314</b>   | <b>637</b>   | <b>1533</b>  | <b>2240</b>  | <b>5650</b>  | <b>3020</b>  | <b>2808</b>  | <b>3987</b>  | <b>8809</b>  | <b>8000</b>  | <b>1120</b>  | <b>8650</b>  |
| <b>Diatoms</b>                             |              |              |               |              |              |              |              |              |              |              |              |              |              |              |              |              |
| <i>Aulacoseira italica</i>                 | 0            | 0            | 0             | 0            | 0            | 0            | 10           | 0            | 0            | 0            | 0            | 0            | 0            | 0            | 0            | 0            |
| <i>Aulacoseira distans</i>                 | 0            | 0            | 20            | 0            | 0            | 0            | 0            | 0            | 0            | 0            | 0            | 0            | 0            | 0            | 0            | 0            |
| <i>Cyclotella</i>                          | 300          | 200          | 60            | 0            | 10           | 0            | 0            | 30           | 10           | 0            | 30           | 0            | 20           | 10           | 10           | 10           |
| <i>Cymbella</i>                            | 0            | 0            | 0             | 0            | 0            | 0            | 0            | 0            | 0            | 0            | 10           | 0            | 0            | 0            | 0            | 0            |
| <i>Fragilaria crotonensis</i>              | 0            | 0            | 0             | 0            | 0            | 10           | 10           | 0            | 0            | 0            | 0            | 0            | 0            | 0            | 0            | 10           |
| <i>Navicula</i>                            | 0            | 0            | 0             | 0            | 0            | 0            | 0            | 0            | 0            | 0            | 0            | 10           | 0            | 0            | 0            | 0            |
| <i>Nitzschia</i>                           | 30360        | 40920        | 168360        | 31220        | 10100        | 11290        | 5220         | 19140        | 43500        | 5600         | 180          | 60           | 880          | 4300         | 8500         | 50           |
| Others                                     | 0            | 0            | 0             | 0            | 0            | 0            | 0            | 0            | 0            | 10           | 0            | 0            | 0            | 0            | 0            | 0            |
| <b>Total</b>                               | <b>30660</b> | <b>41120</b> | <b>168440</b> | <b>31220</b> | <b>10110</b> | <b>11300</b> | <b>5240</b>  | <b>19170</b> | <b>43510</b> | <b>5610</b>  | <b>220</b>   | <b>70</b>    | <b>900</b>   | <b>4310</b>  | <b>8510</b>  | <b>70</b>    |
| <b>Green algae</b>                         |              |              |               |              |              |              |              |              |              |              |              |              |              |              |              |              |
| <i>Ankistrodesmus</i>                      | 40           | 1000         | 140           | 130          | 0            | 40           | 0            | 0            | 30           | 0            | 0            | 10           | 0            | 0            | 0            | 0            |
| <i>Cosmarium</i>                           | 0            | 0            | 0             | 0            | 0            | 0            | 0            | 0            | 10           | 10           | 0            | 10           | 0            | 0            | 10           | 10           |
| <i>Gleocystis</i>                          | 0            | 0            | 0             | 0            | 0            | 0            | 0            | 0            | 0            | 0            | 140          | 0            | 0            | 0            | 0            | 0            |
| <i>Oocystis</i>                            | 0            | 0            | 0             | 0            | 0            | 0            | 0            | 0            | 0            | 0            | 0            | 0            | 30           | 0            | 0            | 0            |
| <i>Pleodorina</i>                          | 0            | 0            | 0             | 0            | 0            | 0            | 0            | 0            | 0            | 0            | 0            | 0            | 10           | 0            | 0            | 0            |
| <i>Scenedesmus</i>                         | 29300        | 31750        | 11420         | 6200         | 180          | 470          | 1320         | 700          | 300          | 30           | 20           | 50           | 50           | 50           | 30           | 450          |
| <i>Sphaerocystis Schroeteri</i>            | 130          | 1200         | 270           | 0            | 0            | 330          | 10           | 70           | 130          | 550          | 230          | 40           | 310          | 160          | 0            | 100          |
| <i>Staurastum</i>                          | 0            | 0            | 0             | 0            | 0            | 0            | 0            | 0            | 30           | 10           | 0            | 0            | 0            | 0            | 0            | 10           |
| Others                                     | 540          | 220          | 270           | 370          | 9380         | 11480        | 9440         | 2710         | 0            | 4620         | 6600         | 12000        | 14500        | 6600         | 6400         | 17000        |
| <b>Total</b>                               | <b>30010</b> | <b>34170</b> | <b>12100</b>  | <b>6700</b>  | <b>9570</b>  | <b>12320</b> | <b>10770</b> | <b>3480</b>  | <b>500</b>   | <b>5220</b>  | <b>6990</b>  | <b>12110</b> | <b>14900</b> | <b>6810</b>  | <b>6440</b>  | <b>17570</b> |
| <b>Others</b>                              |              |              |               |              |              |              |              |              |              |              |              |              |              |              |              |              |
| <i>Cryptomonas</i>                         | 10           | 0            | 0             | 0            | 20           | 0            | 10           | 0            | 300          | 10           | 0            | 0            | 20           | 330          | 0            | 30           |
| <i>Mallomonas, Ceratium, Trachelomonas</i> | 0            | 0            | 0             | 0            | 0            | 0            | 0            | 0            | 0            | 0            | 0            | 0            | 0            | 0            | 0            | 0            |
| <b>Total Algae</b>                         | <b>62105</b> | <b>76540</b> | <b>180927</b> | <b>38299</b> | <b>29394</b> | <b>35737</b> | <b>26993</b> | <b>27600</b> | <b>49960</b> | <b>18480</b> | <b>16618</b> | <b>28167</b> | <b>39129</b> | <b>26050</b> | <b>22470</b> | <b>43320</b> |

**Table S3** Algae population (units/mL) in river U in May 2022.

| Date                                              | 6 May | 9 May | 16 May | 17 May | 26 May | 31 May |
|---------------------------------------------------|-------|-------|--------|--------|--------|--------|
| <b>Cyanobacteria</b>                              |       |       |        |        |        |        |
| <i>Aphanocapsa</i>                                | 0     | 0     | 10     | 0      | 0      | 0      |
| <i>Chroococcus</i>                                | 0     | 0     | 10     | 0      | 0      | 0      |
| <i>Microcystis aeruginosa</i>                     | 0     | 0     | 0      | 0      | 0      | 10     |
| <i>Nostoc</i>                                     | 0     | 0     | 0      | 0      | 0      | 20     |
| <i>Pseudanabaena</i> sp.<br>(2-MIB producing)     | 40    | 40    | 10     | 20     | 20     | 10     |
| <i>Pseudanabaena limnetica</i>                    | 0     | 0     | 0      | 10     | 10     | 0      |
| Other (unicellular single cyanobacteria)          | 600   | 430   | 16500  | 1520   | 1000   | 1650   |
| <b>Diatoms</b>                                    |       |       |        |        |        |        |
| <i>Aulacoseira distans</i>                        | 40    | 0     | 0      | 20     | 0      | 0      |
| <i>Aulacoseira</i> g var ang f<br><i>spiralis</i> | 10    | 10    | 130    | 70     | 0      | 0      |
| <i>Aulacoseira granulata</i>                      | 0     | 0     | 10     | 0      | 0      | 0      |
| <i>Aulacoseira italica</i>                        | 0     | 0     | 30     | 0      | 0      | 0      |
| <i>Cyclotella</i>                                 | 20    | 10    | 470    | 210    | 10     | 20     |
| <i>Cymbella</i>                                   | 30    | 80    | 10     | 20     | 20     | 10     |
| <i>Diatoma</i>                                    | 40    | 0     | 400    | 0      | 0      | 0      |
| <i>Gomphonema</i>                                 | 0     | 10    | 0      | 0      | 10     | 0      |
| <i>Navicula</i>                                   | 50    | 80    | 30     | 130    | 70     | 30     |
| <i>Nitzschia</i>                                  | 80    | 70    | 60     | 20     | 120    | 40     |
| Others                                            | 0     | 20    | 20     | 20     | 0      | 0      |
| <b>Green algae</b>                                |       |       |        |        |        |        |
| <i>Ankistrodesmus</i>                             | 0     | 0     | 10     | 0      | 0      | 0      |
| <i>Chlamydomonas</i>                              | 10    | 10    | 10     | 0      | 0      | 0      |
| <i>Closterium aciculare</i>                       | 0     | 0     | 0      | 10     | 0      | 0      |
| <i>Cosmarium</i>                                  | 110   | 50    | 340    | 330    | 10     | 20     |
| <i>Micractinium pusillum</i>                      | 0     | 0     | 10     | 0      | 0      | 0      |
| Oocystis                                          | 0     | 0     | 10     | 0      | 0      | 0      |
| <i>Pandorina</i>                                  | 0     | 20    | 0      | 0      | 0      | 0      |
| <i>Pediastrum</i>                                 | 0     | 0     | 20     | 10     | 10     | 0      |
| <i>Scenedesmus</i>                                | 10    | 90    | 60     | 90     | 260    | 70     |
| <i>Sphaerocystis</i>                              | 0     | 0     | 40     | 40     | 0      | 30     |
| <i>Staurastrum</i>                                | 0     | 0     | 0      | 10     | 0      | 0      |
| Others                                            | 2180  | 1910  | 2640   | 1650   | 3000   | 4290   |
| <b>Others</b>                                     |       |       |        |        |        |        |
| <i>Cryptomonas</i>                                | 10    | 0     | 0      | 10     | 0      | 0      |
| <i>Mallomonas</i>                                 | 0     | 0     | 0      | 0      | 0      | 0      |
| <i>Ceratium</i>                                   | 0     | 0     | 0      | 0      | 0      | 0      |
| <i>Trachelomonas</i>                              | 0     | 0     | 0      | 0      | 0      | 0      |
